# Supplementary material for: Peripherally “tertiary butyl ester” functionalized bipyridine cored dendrons: from synthesis and characterization to molecular dynamic simulation study
Source: Royal Society of Chemistry journal article supplement (doi:10.1039/d3nj00335c), 2023-01-01
Supplement: d3nj00335c1.pdf [file d3nj00335c1.pdf]

## Peripherally "tertiary butyl ester" functionalized bipyridine cored dendrons: From Synthesis, Characterization to Molecular Dynamic Simulation study

Liju Raju<sup>a</sup>, Sousa Javan Nikkhah<sup>b\*</sup>, Matthias Vandichel<sup>b</sup> and Eswaran Rajkumar<sup>a\*</sup>

<sup>a</sup>Department of Chemistry, Madras Christian College (Autonomous), Affiliated to the University of Madras, Tambaram East, Chennai, Tamilnadu, India.

erajkumar@mcc.edu.in

<sup>b</sup>Department of Chemical Sciences, Bernal Institute, University of Limerick, Republic of Ireland

Sousa.Javannikkhah@ul.ie

### Synthesis

Carbon tetrabromide, 18-crown-6, 3,5-dihydroxy benzyl alcohol, triphenyl phosphine, *tert*-butyl bromoacetate, silica gel (100-200 and 60-120 mesh) for column chromatography, silica gel G-type for TLC (Avra) were used as received. Molecular sieves 4Å (Avra) was used after activating by heating in an oven at 120°C for 8h. Calcium chloride (anhydrous) and sodium sulphate anhydrous (Merck) were used as such for drying solvents. Double distilled water obtained by distilling pre-distilled water over alkaline potassium permanganate was used throughout the study. 99.5% acetone (SRL), acetonitrile (VETEC), chloroform (SRL), 99.5% dichloromethane (SRL), ethanol, 99.5% ethyl acetate (SRL), 99% hexane (SRL), and methanol (NICE) were used as obtained. 4,4'-bromomethyl 2,2'-bipyridine was prepared from the previously published literature.<sup>1</sup>

### Instrumentations

<sup>1</sup>H-NMR spectra were recorded on a Bruker 400MHz and 500MHz spectrometer in CDCl<sub>3</sub> solvent, <sup>13</sup>C-NMR was recorded on 100MHz Bruker spectrometer in CDCl<sub>3</sub>, HRMS and ESI-MS mass spectrometry was recorded using XEVO-G2 XS QTOF mass spectrometer in positive mode. The DLS measurements were recorded using a dynamic light scattering (DLS) instrument (Zetasizer ZS, Nano series ZEN 3600, Malvern Instruments Ltd, U.K.) The contact angle measurements were performed by employing a Hol-marc HO-IOD-CAN-018 equipment at ambient temperature.

### 1. Synthesis of 3,5-bis(2'-(*tert*-butoxy)-2-oxoethoxy)benzyl bromide (G0-Br)

The product was obtained as a white solid, 70% yield. <sup>1</sup>H NMR (400 MHz, CDCl<sub>3</sub>): δ 6.47 (d, 2H), 6.34 (t, 1H), 4.41 (s, 4H), 4.31 (s, 2H), 1.42 (s, 18H). <sup>13</sup>C NMR (100 MHz, CDCl<sub>3</sub>): δ 168.84, 159.02, 139.94, 108.33, 102.08, 82.55, 65.29, 27.81.

## 2. Synthesis of 3,5-bis[3',5'-bis(2-(*tert*-butoxy)-2-oxoethoxy)benzyloxy]benzyl bromide (G1-Br)

The product was obtained as white solid, with 54% yield. <sup>1</sup>H NMR (400 MHz, CDCl<sub>3</sub>): δ 6.59-6.58 (m, 6H), 6.47 (t, *J* = 2.3 Hz, 1H), 6.44 (t, *J* = 2.0 Hz, 2H), 4.41 (s, 4H), 4.47 (s, 8H), 4.38 (s, 2H), 1.47 (s, 36H). <sup>13</sup>C NMR (100 MHz, CDCl<sub>3</sub>): δ 167.83, 160.26, 159.57, 140.01, 139.47, 108.55, 106.81, 102.52, 101.89, 82.47, 70.11, 66.16, 33.41, 28.20.

## 3. Synthesis of 3, 5 - bis [3', 5'-bis (2-(*tert*-butoxy)-2-oxoethoxy)benzyloxy]benzyl alcohol (G1-OH)

The crude product was purified by chromatography with hexane/ethyl acetate (2:1.5) as the eluent to yield a colorless oil, 90% yield. <sup>1</sup>H NMR (400 MHz, CDCl<sub>3</sub>): δ 6.57-6.52 (m, 6H), 6.39 (t, *J* = 2.3 Hz, 1H), 6.36 (t, *J* = 2.3 Hz, 2H), 4.87 (s, 4H), 4.54 (s, 2H), 4.41 (s, 8H), 1.41 (s, 36H). <sup>13</sup>C NMR (100 MHz, CDCl<sub>3</sub>): δ 167.80, 159.92, 159.20, 139.52, 106.92, 101.36, 82.46, 69.69, 65.72, 65.37, 28.03 HR-MS Chemical Formula C<sub>45</sub>H<sub>60</sub>O<sub>15</sub> [M+H]<sup>+</sup> m/z : 841.4019 Exact Mass: 840.393u

## 4. Synthesis of 3,5-bis[3',5'-bis [3'', 5''-bis(2-(*tert*-butoxy)-2-oxoethoxy)benzyloxy] benzyloxy] benzyl alcohol (G2-OH)

The crude product was purified by chromatography with hexane/ethyl acetate (2:1.5) as the eluent to yield a colorless oil (Yield 90%). <sup>1</sup>H NMR (400 MHz, CDCl<sub>3</sub>): δ 6.63 (d, *J* = 2.3 Hz, 4H), 6.59 (d, *J* = 2.5 Hz, 10H), 6.51 (t, *J* = 2.3 Hz, 1H), 6.49 (t, *J* = 2.3 Hz, 2H), 6.43 (t, *J* = 2.3 Hz, 4H), 4.94 (s, 12H), 4.47 (s, 2H), 4.48 (s, 16), 1.47 (s, 72H). <sup>13</sup>C NMR (100 MHz, CDCl<sub>3</sub>): δ 167.77, 160.17, 160.11, 139.54, 106.68, 106.54, 105.97, 101.79, 101.68, 82.36, 66.01, 28.05 HRMS Chemical Formula C<sub>97</sub>H<sub>124</sub>O<sub>31</sub> [M+H]<sup>+</sup> m/z: 1785.816 Exact Mass: 1784.813u

## 5. Synthesis of 4,4'-bis [3'',5''-bis(2-(*tert*-butoxy)-2-oxoethoxy)benzyloxy]2,2'-bipyridine (G0-bpy)

The product was obtained as a reddish oil liquid, yield of 98% <sup>1</sup>H-NMR CDCl<sub>3</sub>- δ 1.48 (36H-CH<sub>3</sub>), δ 4.47 (4H-CH<sub>2</sub>), δ 4.59 (4H-CH<sub>2</sub>-O), δ 6.39 (2H, Ar-H), δ 6.52 (4H Ar-H), δ 7.28 (2H, Ar-H (bpy)), δ 8.43 (4H Ar-H (bpy)) <sup>13</sup>C-NMR CDCl<sub>3</sub> δ 27.88 CH<sub>3</sub>, δ 5.703 CH<sub>2</sub>, δ 77.32 CH<sub>2</sub>, δ 82.44 (*tert*-butyl-C), δ 100.87 (Ar-C), δ 106.14(Ar-C), δ 121.11(Ar-C(Bpy)), δ 123.89 (Ar-C-(bpy)), δ 143.79 (Ar-C), δ 147.43 (Ar-C-(bpy)), δ 149.63 (Ar-C-(bpy)), δ 159.35 (Ar-C-O), δ

167.89 (C=O). ESI MS Chemical Formula: C<sub>50</sub>H<sub>64</sub>N<sub>2</sub>O<sub>14</sub> m/z [M]<sup>+</sup> 916.44 Exact Mass: 916.44u

**6. Synthesis of 4,4'-[3'',5''-bis[3''',5'''-bis(2-(*tert*-butoxy)-2-oxoethoxy)benzyloxy] benzyloxy] 2,2'-bipyridine G1-bpy**

The product was obtained as a red oily liquid with a yield of 96.9%. <sup>1</sup>H NMR CDCl<sub>3</sub>: δ 1.33 (72H, s), 4.43-4.46 (20H, 4.43 (s), 4.46 (s)), 4.61 (4H, s), 4.90 (8H, s), 6.30 (6H), 6.52 (12H), 7.38 (2H), 8.41 (2H), 8.55 (2H, d). <sup>13</sup>C NMR CDCl<sub>3</sub>: δ 28.98 (24C, s), 65.45 (8C, s), 69.27 (8C, s), 81.32 (8C, s), 100.32-100.82 (6C,s), 120.72 (4C, s), 140.6-140.8 (6C,s), 146.7 (2C, s), 149.9 (4C, s), 159.50 (12C,)167.1 (8C, s). HRMS Chemical Formula: C<sub>102</sub>H<sub>128</sub>N<sub>2</sub>O<sub>30</sub> m/z: [M+H]<sup>+</sup> 1861.8585 Exact Mass: 1860.8552 u

**7. Synthesis of 4,4'-bis [3'',5''-bis [3''',5'''-bis [3''',5''''-bis (2-(*tert*-butoxy)-2-oxoethoxy)benzyloxy] benzyloxy] benzyloxy] 2,2'- bipyridine G2-bpy**

The product was obtained as a red oily liquid with a yield of 69.7%. <sup>1</sup>H NMR CDCl<sub>3</sub>: δ 1.47 (144H, s), 4.48-4.62 (40H, (s)), 4.95 (24H,(s)), 6.42-6.59 (14H), 6.59 (28H), 7.27 (2H, ddd), 7.34 (2H, dd, ), 8.35-8.64 (4H, ddd) <sup>13</sup>C NMR CDCl<sub>3</sub>: δ 28.05, 65.80, 69.81, 77.05, 82.43, 101.18-100.57, 106.51, 139.46, 159.46, 160.00, 160.05, 167.78. HRMS Chemical Formula: C<sub>206</sub>H<sub>256</sub>N<sub>2</sub>O<sub>62</sub> m/z [M+1]<sup>+</sup> 3750.7043 Exact Mass: 3749.6941u

**Dynamic light scattering analysis**

**Sample Preparation:** Each dendrons stock solution was made as 1mg/mL in DMSO. Then the DLS analysis of the dendrons solutions (100 μL from stock) were carried out in DMSO-Water Mixture as given in the **Table S1**

**Table S1.** DLS measurement parameters

| Solvent ratios (DMSO : Water) in 5mL | Refractive index | Viscosity cP | Dielectric constant |
|--------------------------------------|------------------|--------------|---------------------|
| 100 % of DMSO                        | 1.4768           | 1.99         | 46.68               |
| 75 % of DMSO                         | 1.4457.          | 3.68         | 55.00               |
| 50% of DMSO                          | 1.4071           | 2.83         | 64.67               |
| 25% of DMSO                          | 1.3677           | 1.50         | 72.88               |
| 100 % of Water                       | 1.3225           | 0.89         | 78.4                |

**Table S2.** Models and simulation details. First an NPT simulation is performed, followed by an NVT simulation.

| System | Initial simulation box size ( $\text{\AA}\times\text{\AA}\times\text{\AA}$ ) | Number of polymer molecules | Solvent | Number of solvent molecules | Conc. (mg/ml) | Simulation time (NPT) (ns) | Simulation box size after the NPT simulation ( $\text{\AA}^3$ ) | Final conc. (mg/ml) | Simulation time (NVT) (ns) |
|--------|------------------------------------------------------------------------------|-----------------------------|---------|-----------------------------|---------------|----------------------------|-----------------------------------------------------------------|---------------------|----------------------------|
| G0-bpy | 50×50×50                                                                     | 1                           | Water   | 4181                        | 12.19         | 10                         | 53.20 <sup>3</sup>                                              | 10.12               | 40                         |
| G1-bpy | 63×63×63                                                                     | 1                           | Water   | 8362                        | 12.37         | 20                         | 67.89 <sup>3</sup>                                              | 9.89                | 50                         |
| G2-bpy | 80×80×80                                                                     | 1                           | Water   | 17124                       | 12.17         | 30                         | 84.20 <sup>3</sup>                                              | 10.44               | 65                         |
| G0-bpy | 50×50×50                                                                     | 1                           | DMSO    | 1054                        | 12.19         | 10                         | 55.90 <sup>3</sup>                                              | 8.72                | 40                         |
| G1-bpy | 63×63×63                                                                     | 1                           | DMSO    | 2118                        | 12.37         | 20                         | 65.90 <sup>3</sup>                                              | 10.81               | 50                         |
| G2-bpy | 80×80×80                                                                     | 1                           | DMSO    | 4337                        | 12.17         | 30                         | 85.40 <sup>3</sup>                                              | 10.00               | 65                         |

# $^1\text{H-NMR}$ and $^{13}\text{C-NMR}$ and Mass spectral analysis

## 1. *t*-butyl iodoacetate

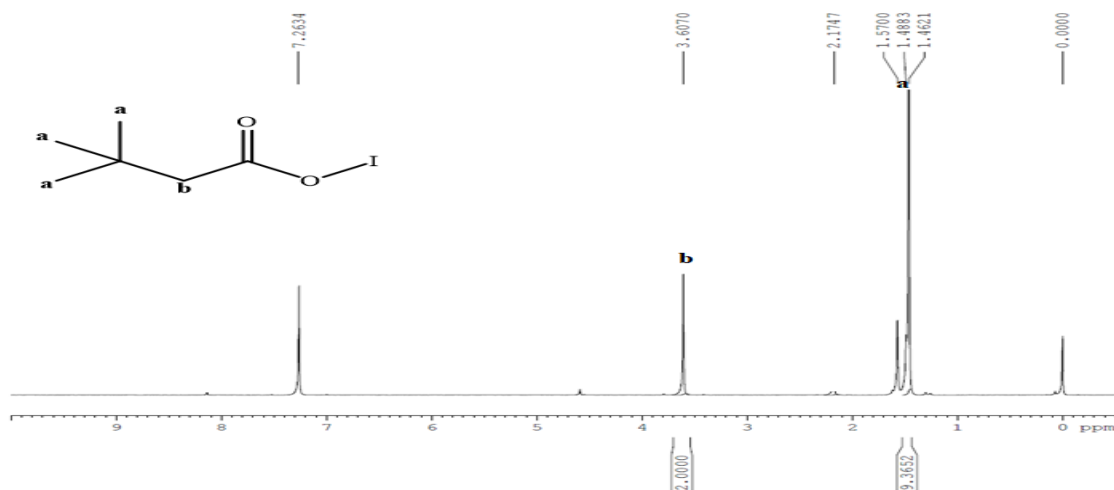

Figure S1.  $^1\text{H-NMR}$   $\text{CDCl}_3$  spectra of *t*-butyl iodoacetate

## 2. 3,5-bis(2'-(tert-butoxy)-2'-oxoethoxy)benzyl alcohol (G0-OH)

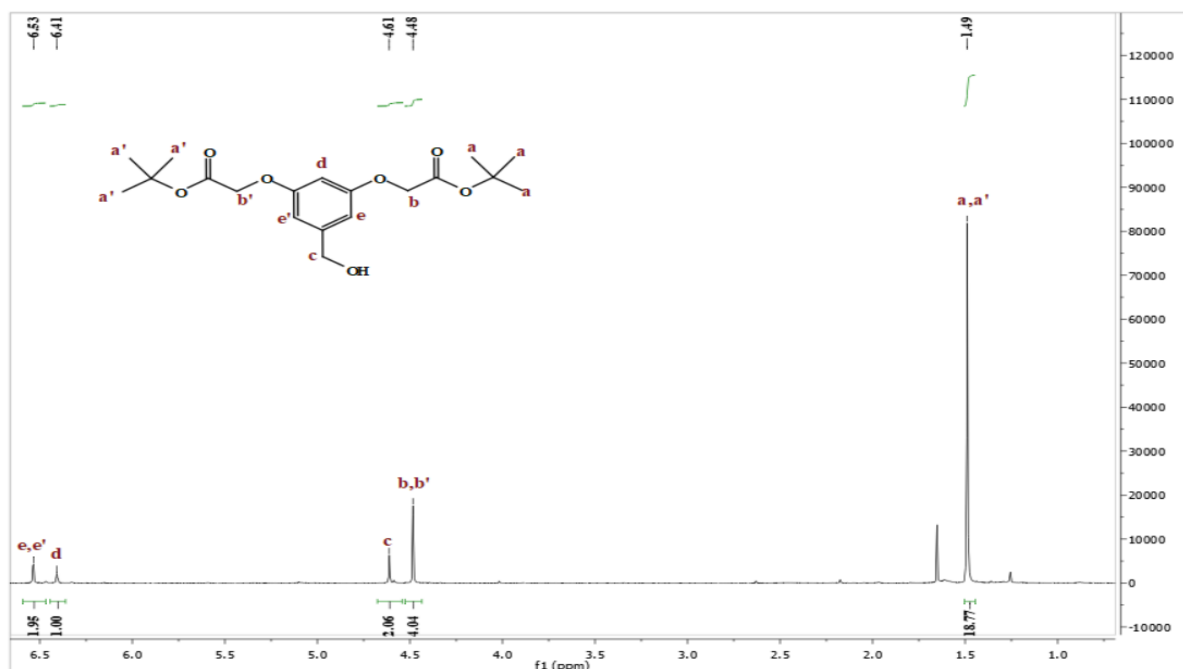

Figure S2.  $^1\text{H-NMR}$   $\text{CDCl}_3$  of 3,5-bis(2'-(tert-butoxy)-2'-oxoethoxy)benzyl alcohol (G0-OH)

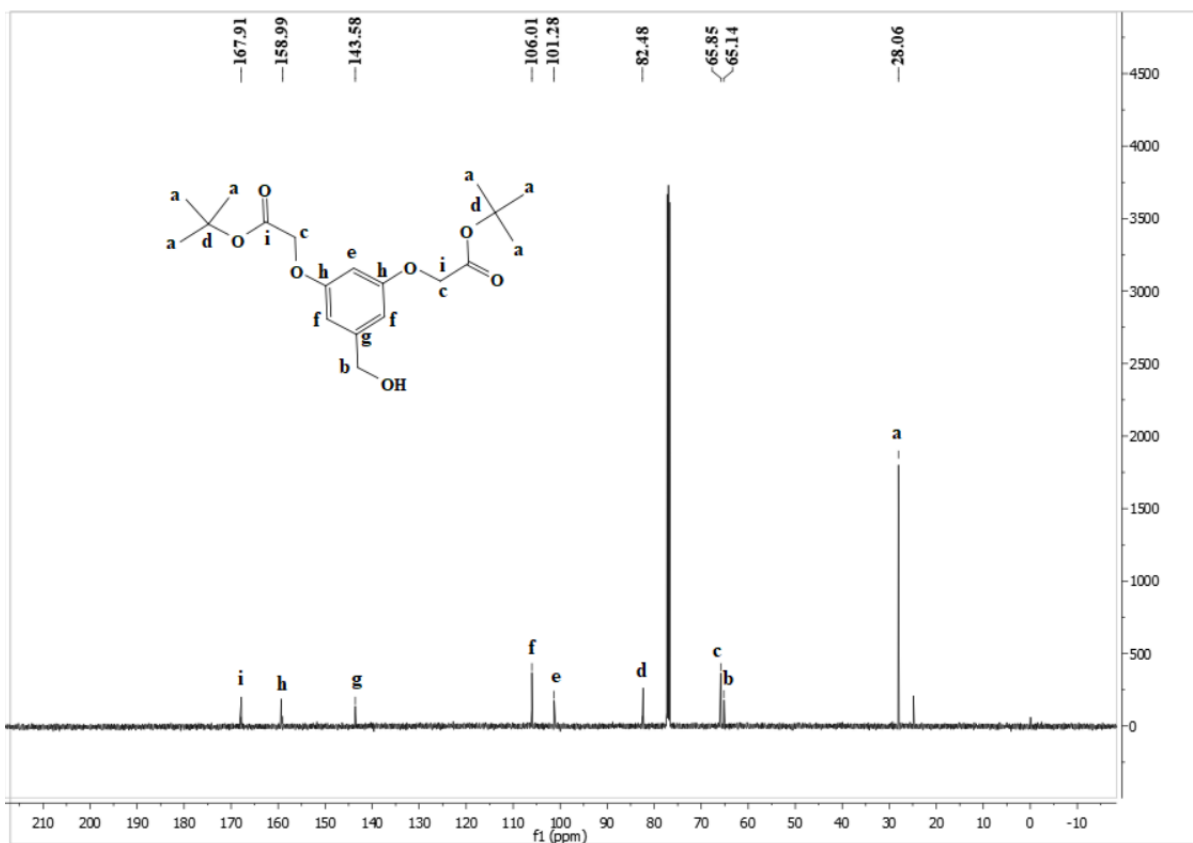

**Figure S3.**  $^{13}\text{C}$ -NMR  $\text{CDCl}_3$  of 3,5-bis(2'-(tert-butoxy)-2'-oxoethoxy)benzyl alcohol (G0-OH)

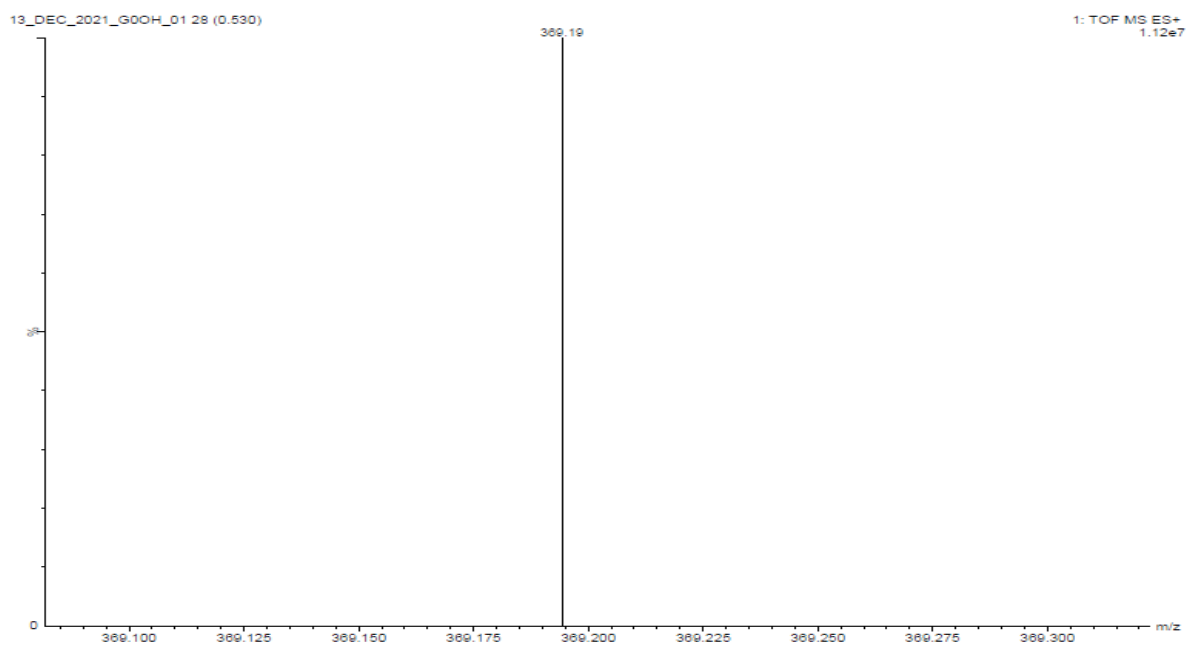

**Figure S4.** ESI MS spectra of 3,5-bis(2'-(tert-butoxy)-2'-oxoethoxy)benzyl alcohol (G0-OH)

3. 3,5-bis(2'-(tert-butoxy)-2-oxoethoxy)benzyl bromide (G0-Br)

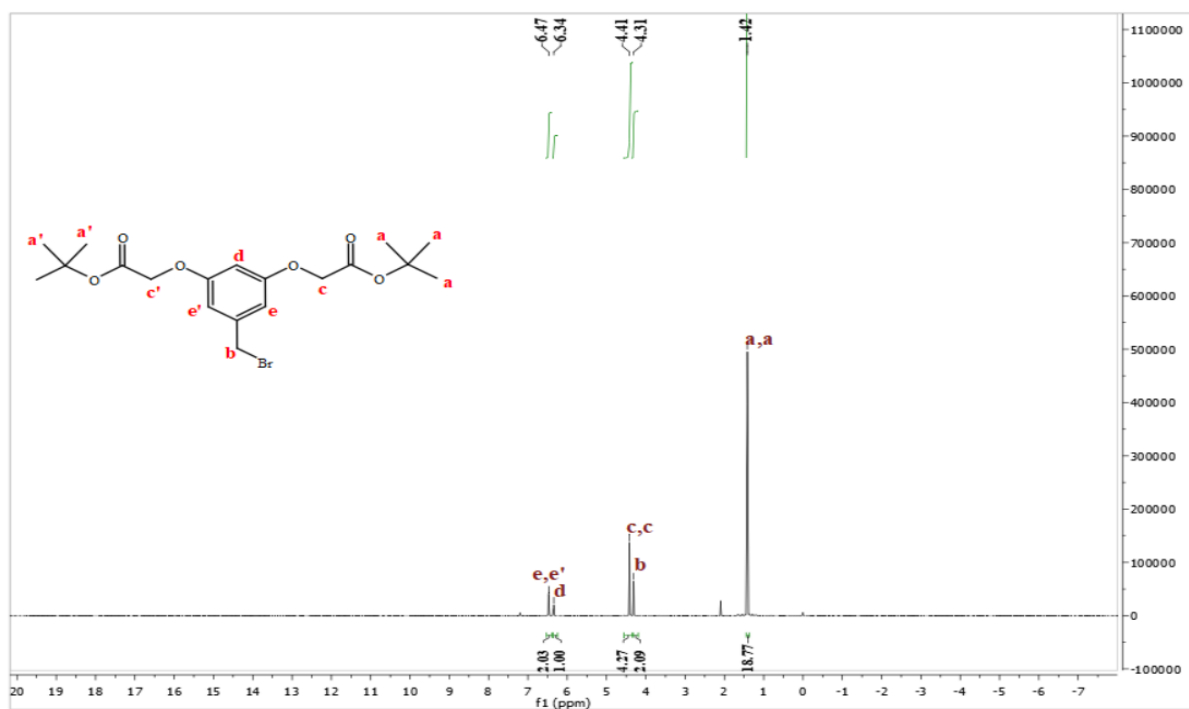

Figure S5. <sup>1</sup>H NMR CDCl<sub>3</sub> spectra of 3,5-bis(2'-(tert-butoxy)-2-oxoethoxy)benzyl bromide (G0-Br)

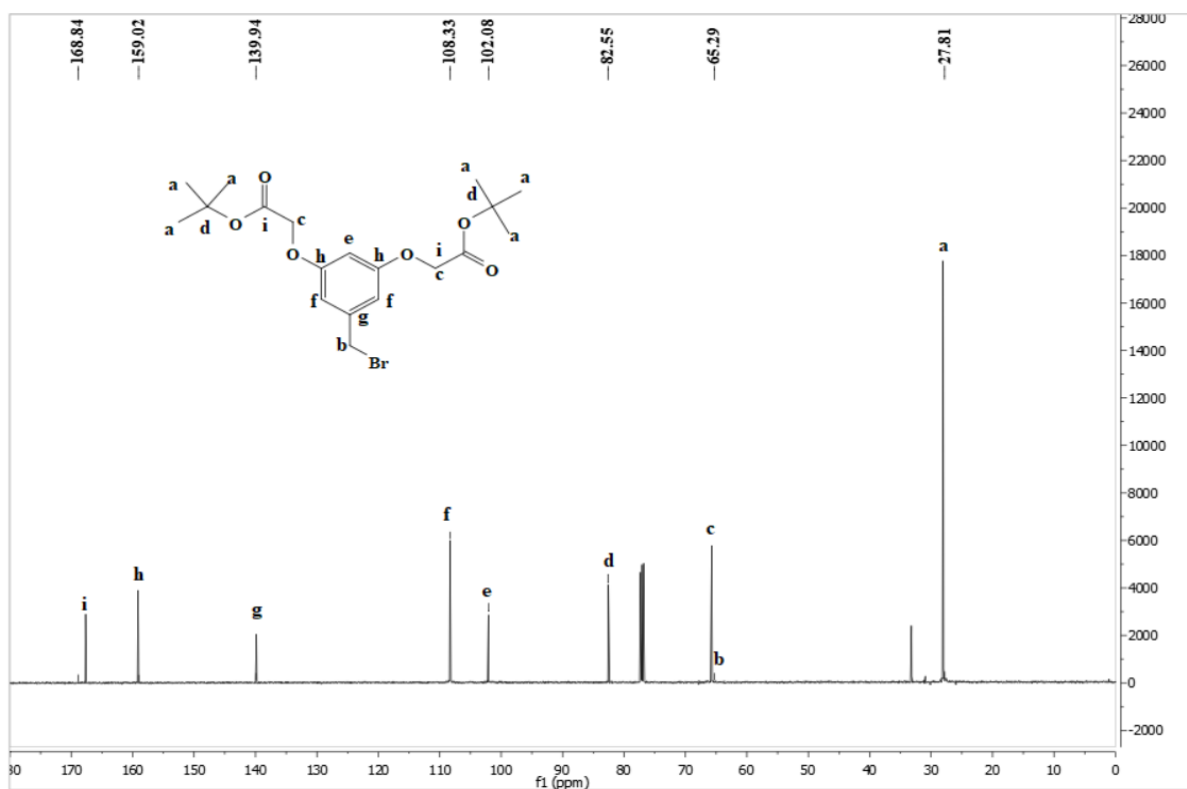

Figure S6. <sup>13</sup>C NMR CDCl<sub>3</sub> spectra of 3,5-bis(2'-(tert-butoxy)-2-oxoethoxy)benzyl bromide (G0-Br)

4. 3, 5 - bis [3', 5'-bis (2-(tert-butoxy)-2-oxoethoxy)benzyloxy]benzyl alcohol **G1-OH**

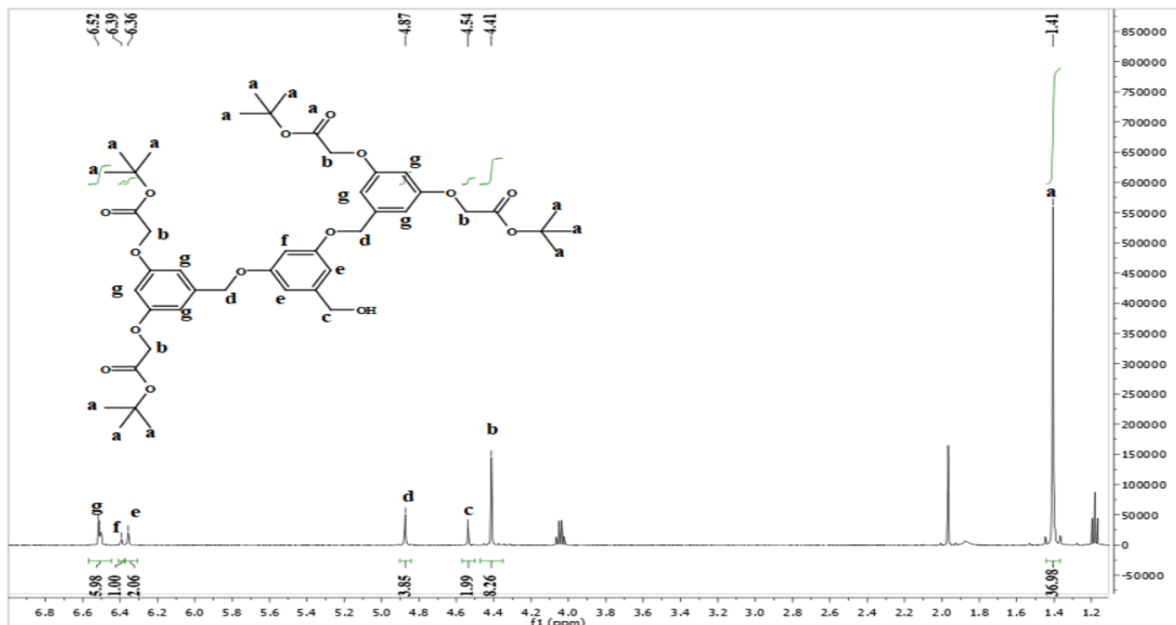

Figure S7.  $^1\text{H-NMR}$   $\text{CDCl}_3$  spectra of 3, 5 - bis [3', 5'-bis (2-(tert-butoxy)-2-oxoethoxy)benzyloxy]benzyl alcohol **G1-OH**

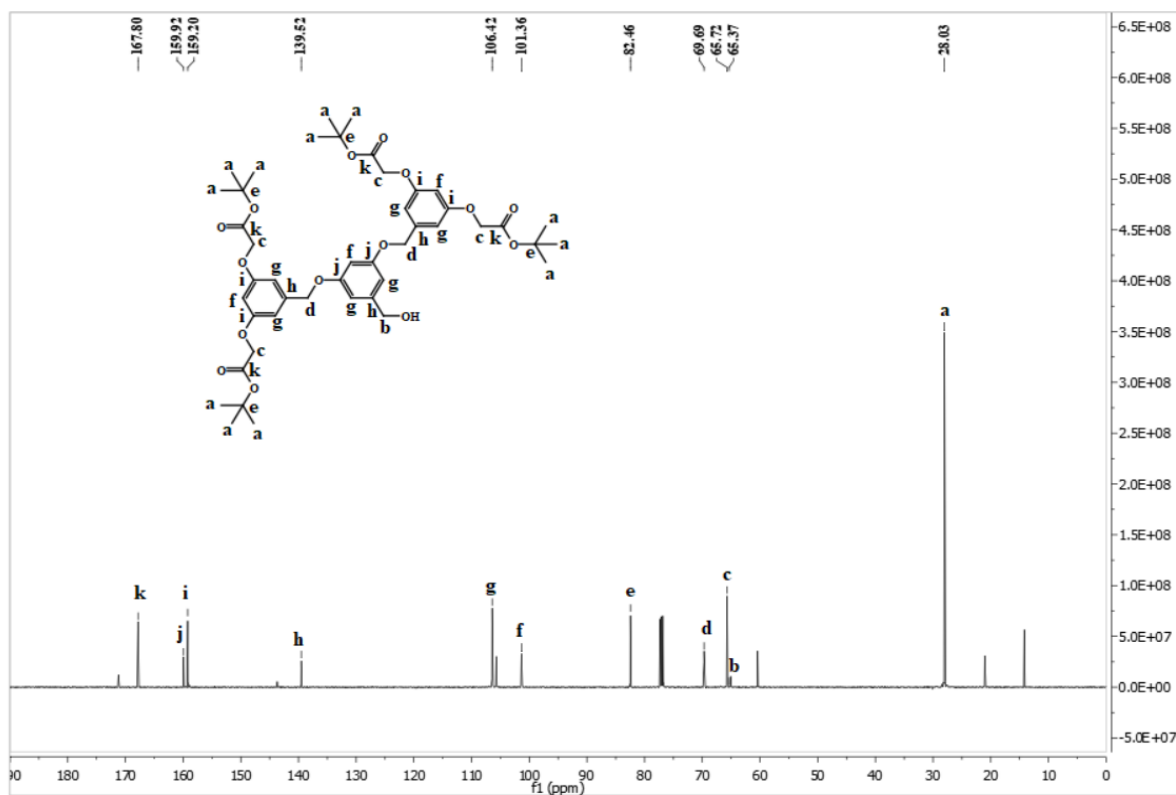

Figure S8.  $^{13}\text{C-NMR}$   $\text{CDCl}_3$  spectra of 3, 5 - bis [3', 5'-bis (2-(tert-butoxy)-2-oxoethoxy)benzyloxy]benzyl alcohol **G1-OH**



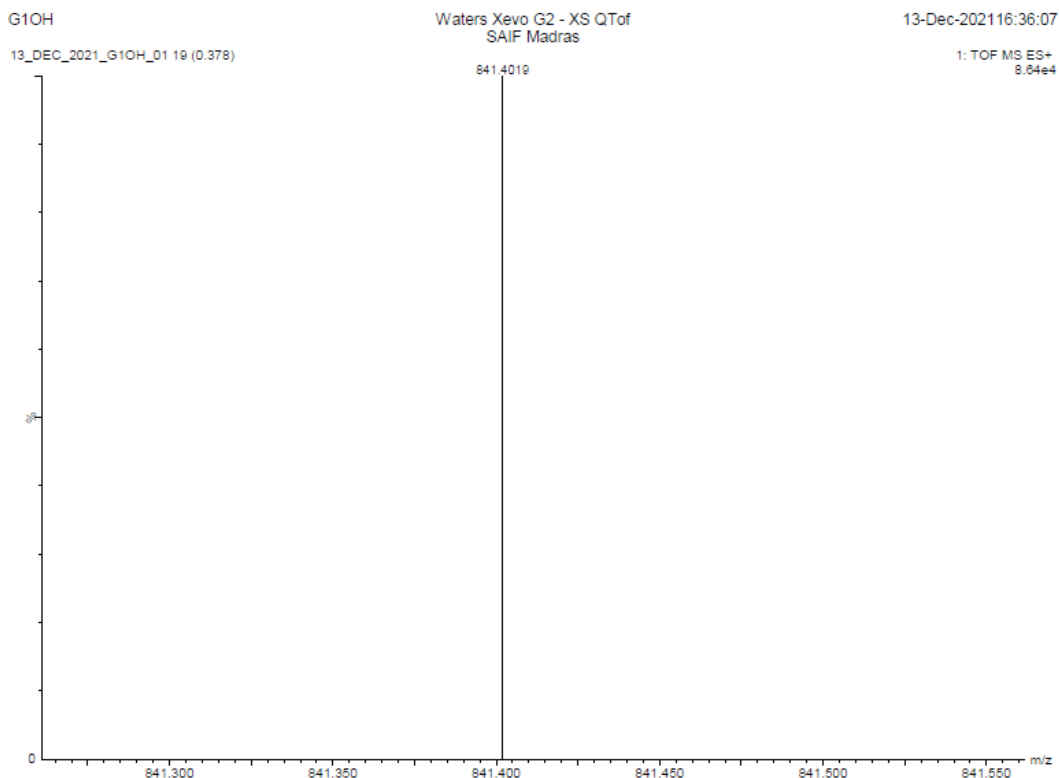

**Figure S9.** HRMS spectra of 3, 5 - bis [3', 5'-bis (2-(tert-butoxy)-2-oxoethoxy)benzyloxy]benzyl alcohol **G1-OH**

**5. 3,5-bis[3',5'-bis(2-(tert-butoxy)-2-oxoethoxy)benzyloxy]benzyl bromide (G1-Br)**

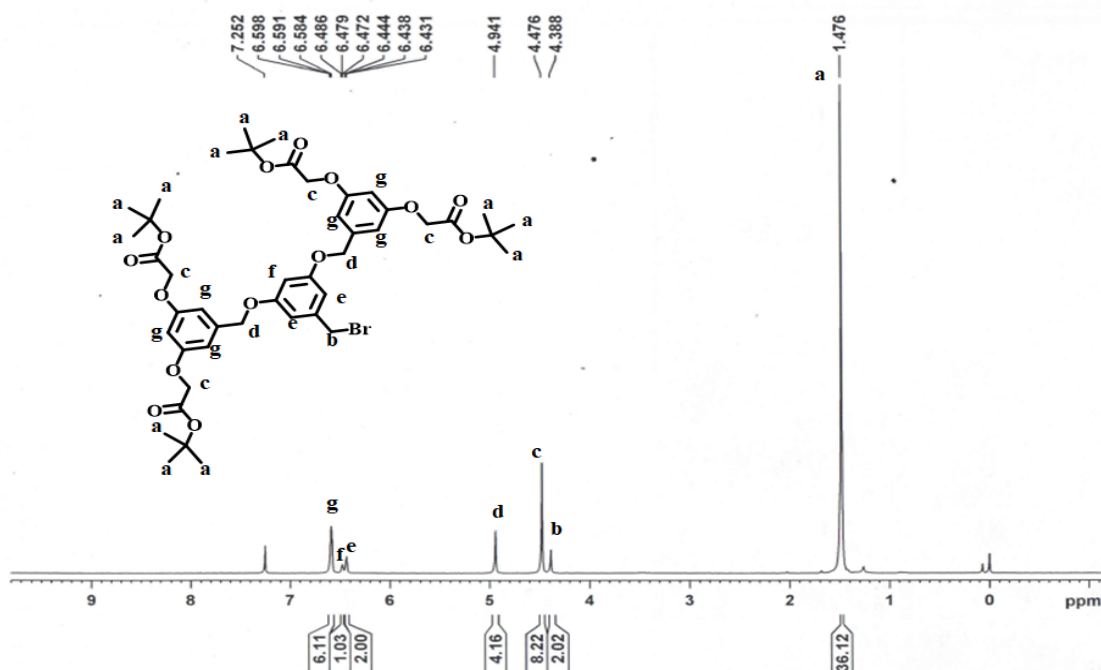

**Figure S10.** <sup>1</sup>H NMR CDCl<sub>3</sub> spectra of 3,5-bis[3',5'-bis(2-(tert-butoxy)-2-oxoethoxy)benzyloxy]benzyl bromide (**G1-Br**)

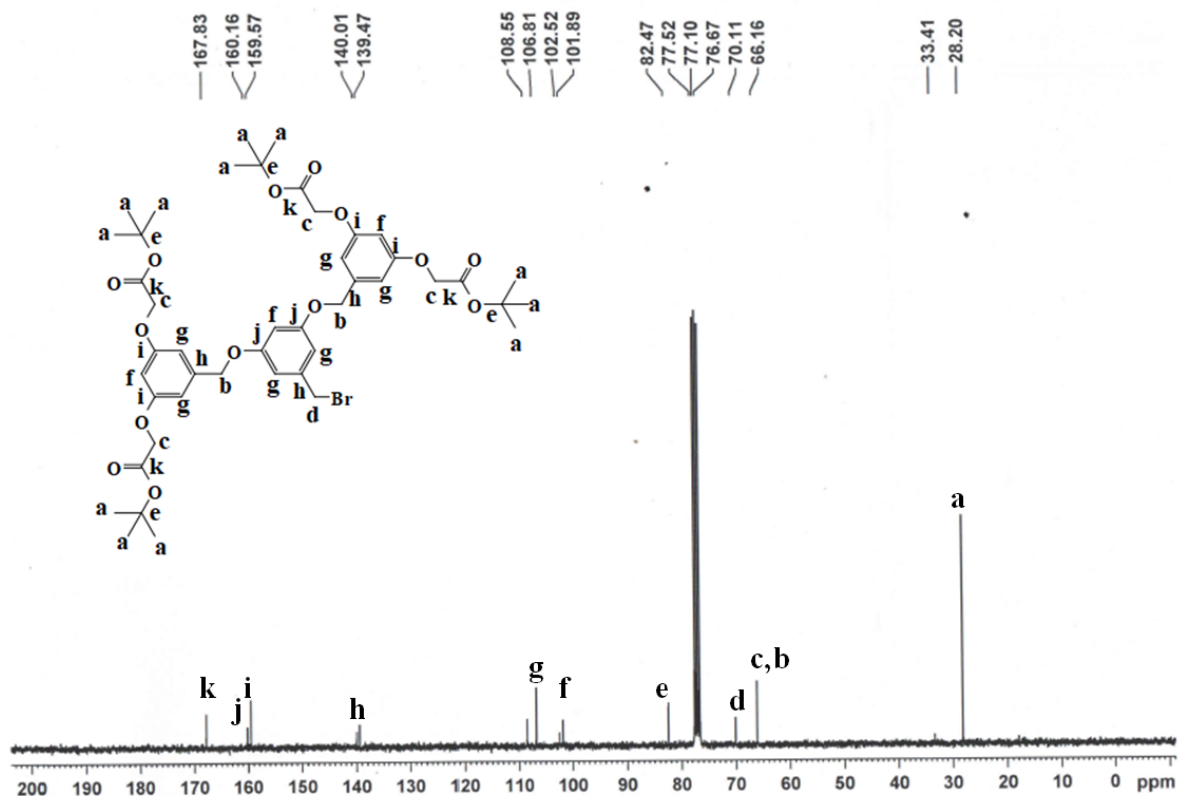

**Figure S11.**  $^{13}\text{C}$ -NMR  $\text{CDCl}_3$  spectra of 3,5-bis[3',5'-bis(2-(tert-butoxy)-2-oxoethoxy)benzyloxy]benzyl bromide (**G1-Br**)

**6. 3,5-bis[3',5'-bis [3'', 5''-bis(2-(tert-butoxy)-2-oxoethoxy)benzyloxy] benzyloxy] benzyl alcohol G2-OH**

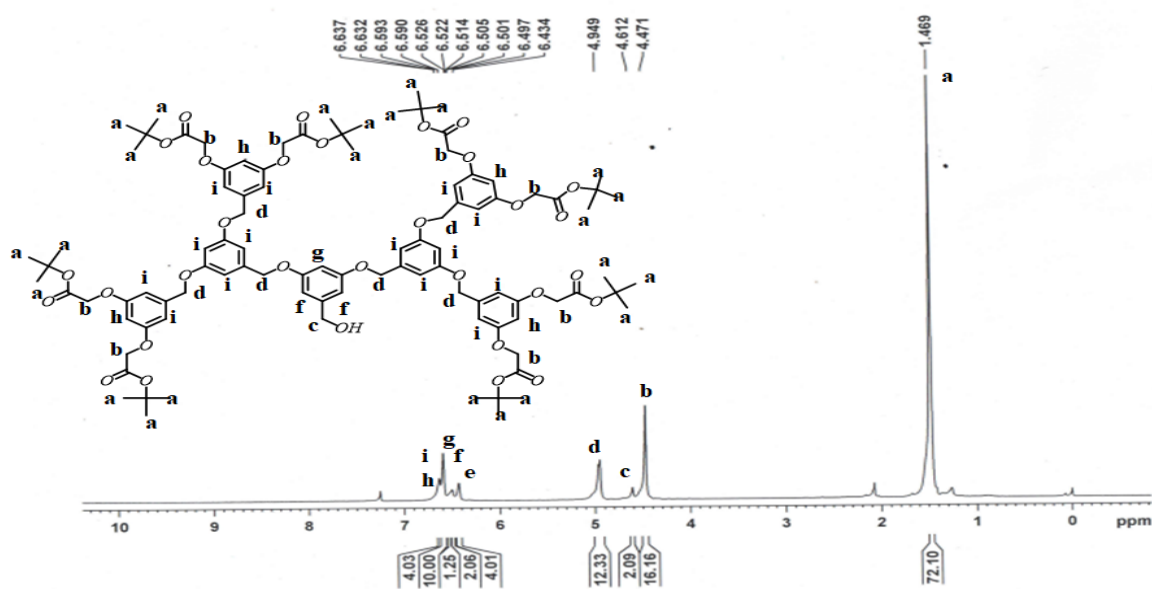

**Figure S12.**  $^1\text{H}$ -NMR  $\text{CDCl}_3$  spectra of 3,5-bis[3',5'-bis [3'', 5''-bis(2-(tert-butoxy)-2-oxoethoxy)benzyloxy] benzyloxy] benzyl alcohol **G2-OH**

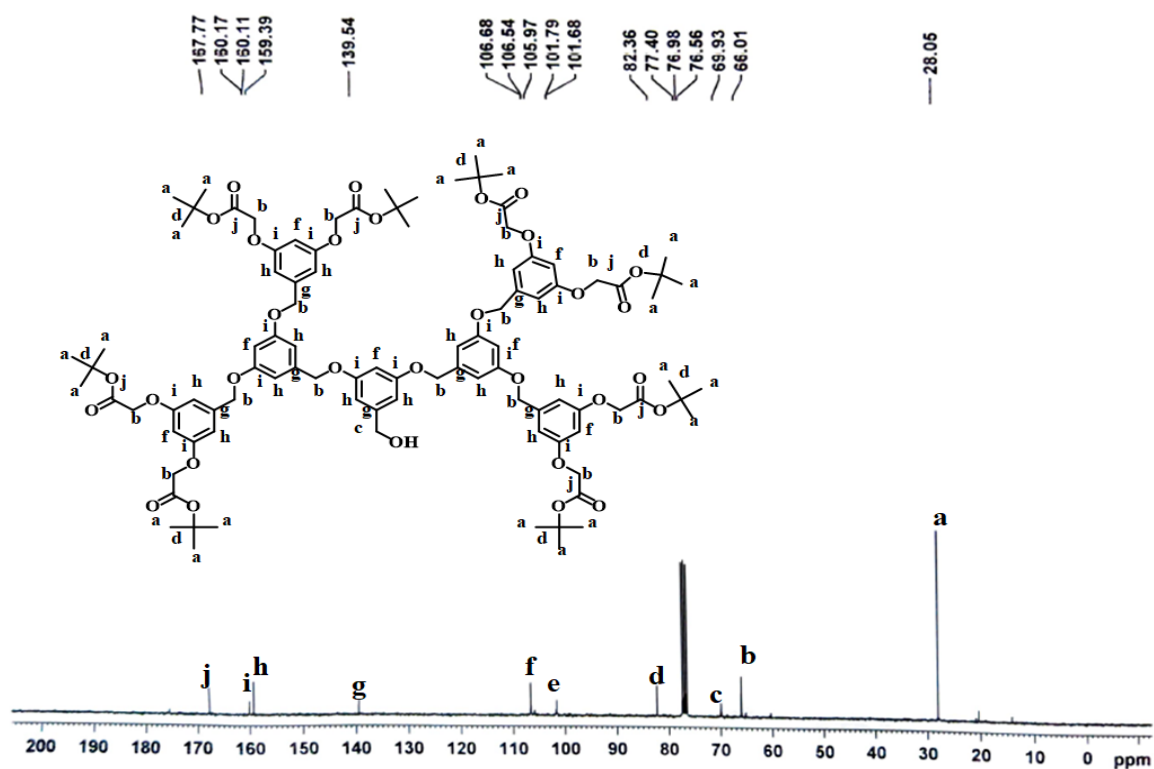

**Figure S13.**  $^{13}\text{C}$ -NMR  $\text{CDCl}_3$  spectra of 3,5-bis[3',5'-bis [3'', 5''-bis(2-(tert-butoxy)-2-oxoethoxy)benzyloxy] benzyloxy] benzyl alcohol **G2-OH**

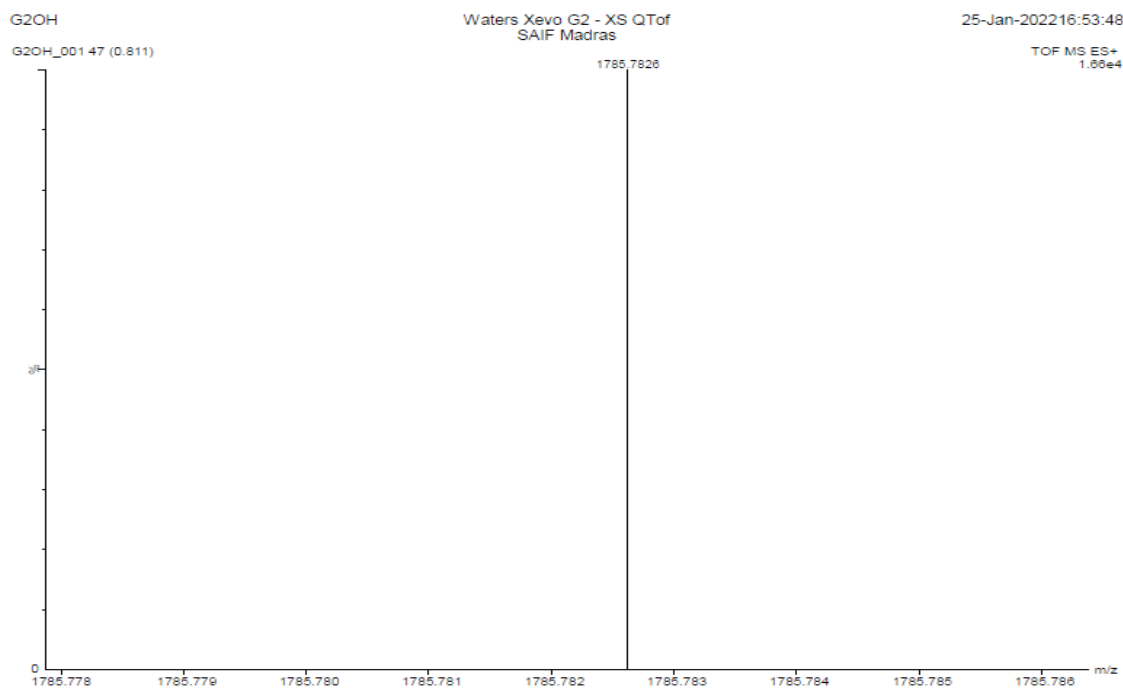

**Figure S14.** HRMS spectra of 3,5-bis[3',5'-bis [3'', 5''-bis(2-(tert-butoxy)-2-oxoethoxy)benzyloxy] benzyloxy] benzyl alcohol **G2-OH**

7. 4,4'-bis [3'',5''-bis(2-(tert-butoxy)-2-oxoethoxy)benzyloxy]2,2'-bipyridine G0-bpy

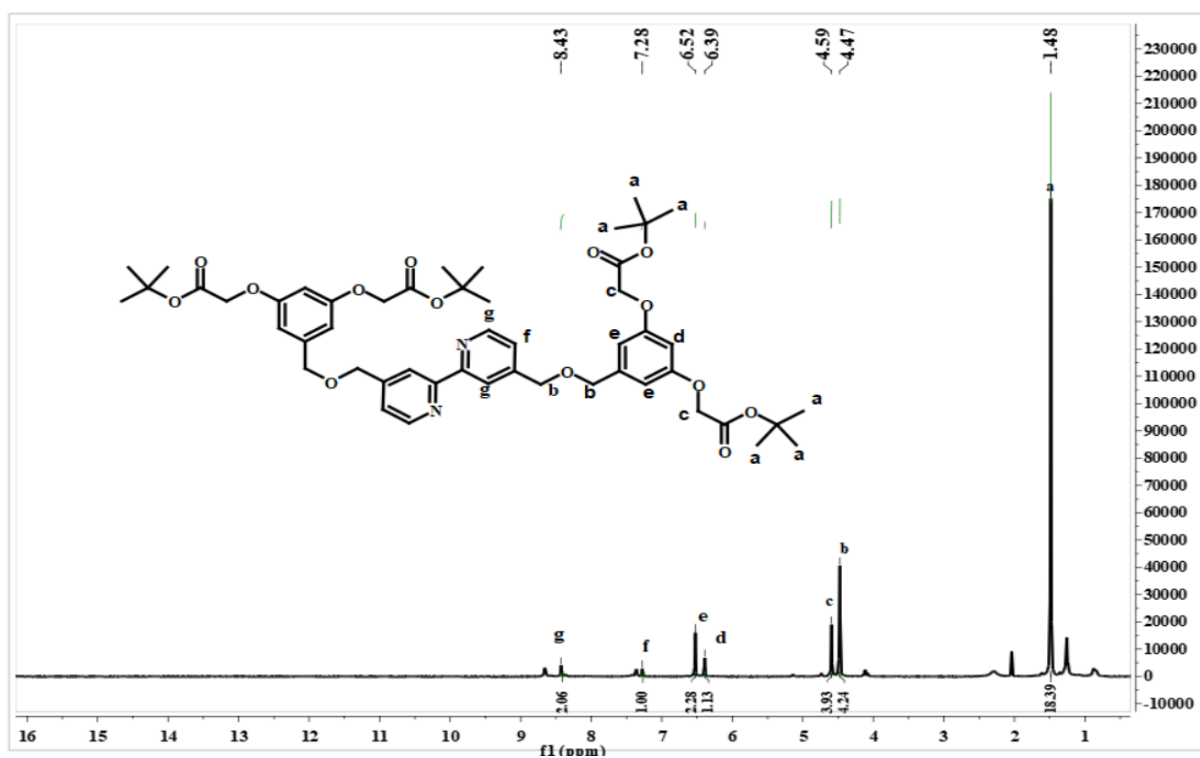

Figure S15. <sup>1</sup>H NMR CDCl<sub>3</sub> spectra of 4,4'-bis [3'',5''-bis(2-(tert-butoxy)-2-oxoethoxy)benzyloxy]2,2'-bipyridine G0-bpy

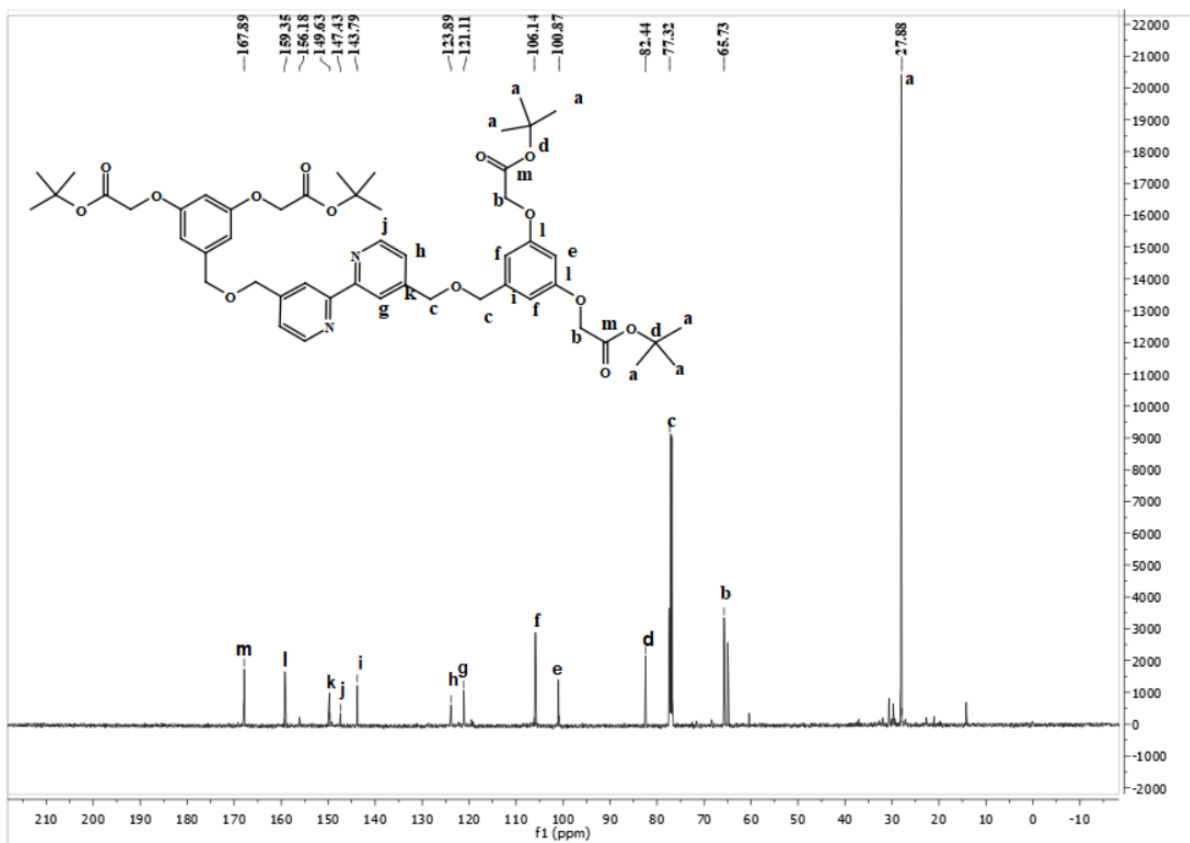

**Figure S16.**  $^{13}\text{C}$  NMR CDCl<sub>3</sub> spectra of 4,4'-bis [3'',5''-bis(2-(tert-butoxy)-2-oxoethoxy)benzyloxy]2,2'-bipyridine **G0-bpy**

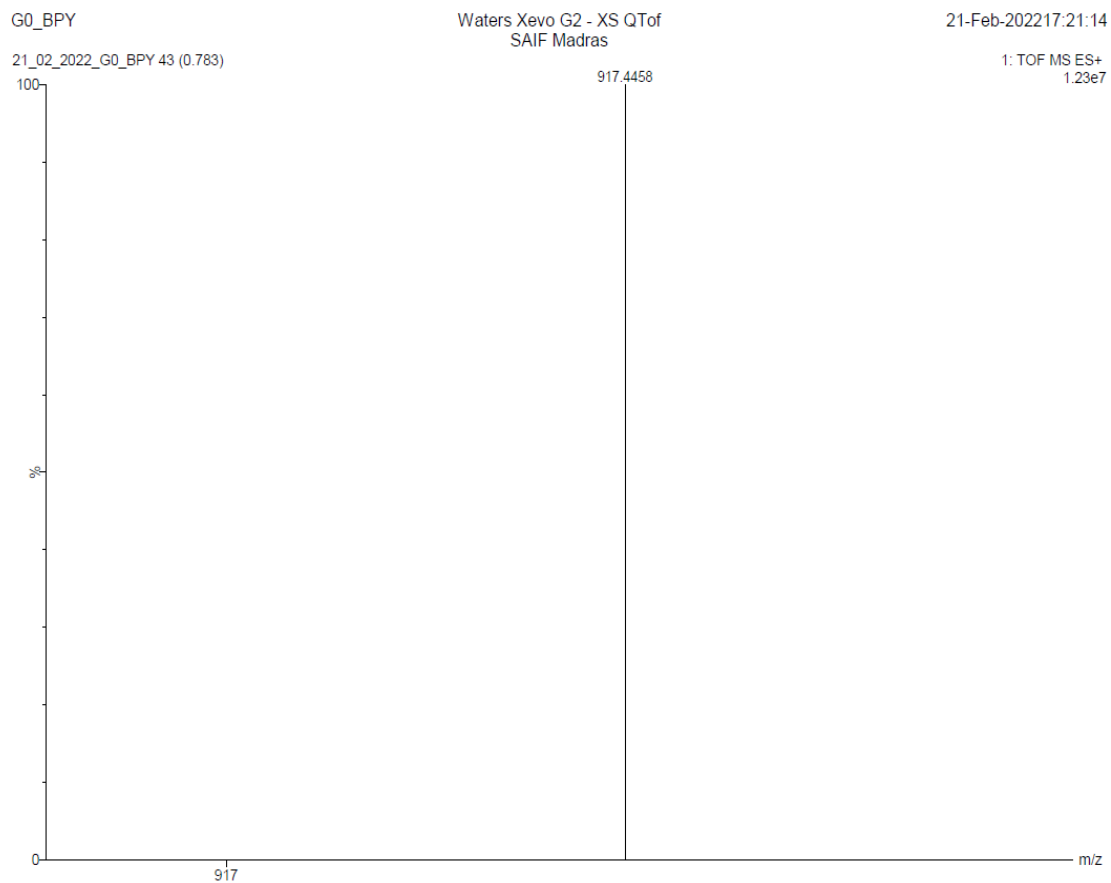

**Figure S17.** HRMS spectra of 4,4'-bis [3'',5''-bis(2-(tert-butoxy)-2-oxoethoxy)benzyloxy]2,2'-bipyridine **G0-bpy**

8. 4,4'- [3'',5''-bis[3''',5''']-bis(2-(tert-butoxy)-2-oxoethoxy)benzyloxy] benzyloxy] 2,2'-bipyridine **G1-bpy**

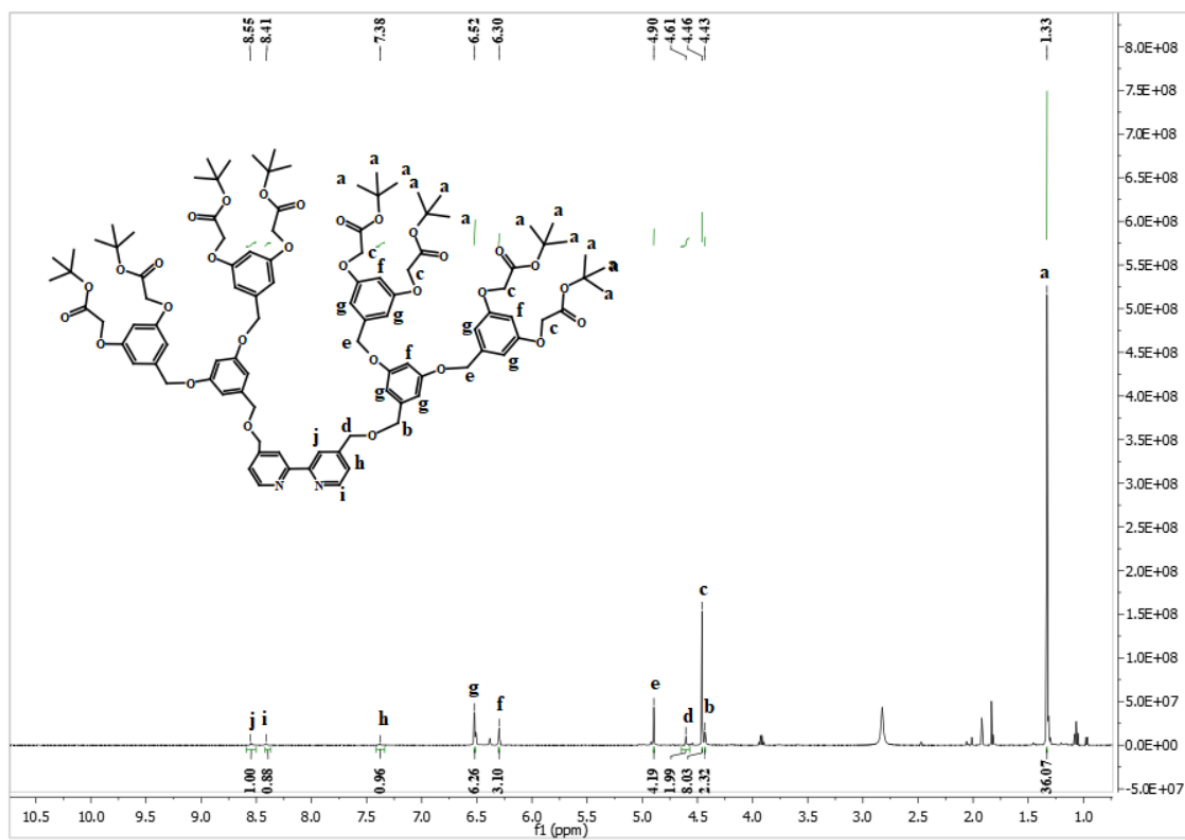

**Figure S18.**  $^1\text{H}$ NMR  $\text{CDCl}_3$  spectra of 4,4'- [3'',5''-bis[3''',5''']-bis(2-(tert-butoxy)-2-oxoethoxy)benzyloxy] benzyloxy] 2,2'-bipyridine **G1-bpy**

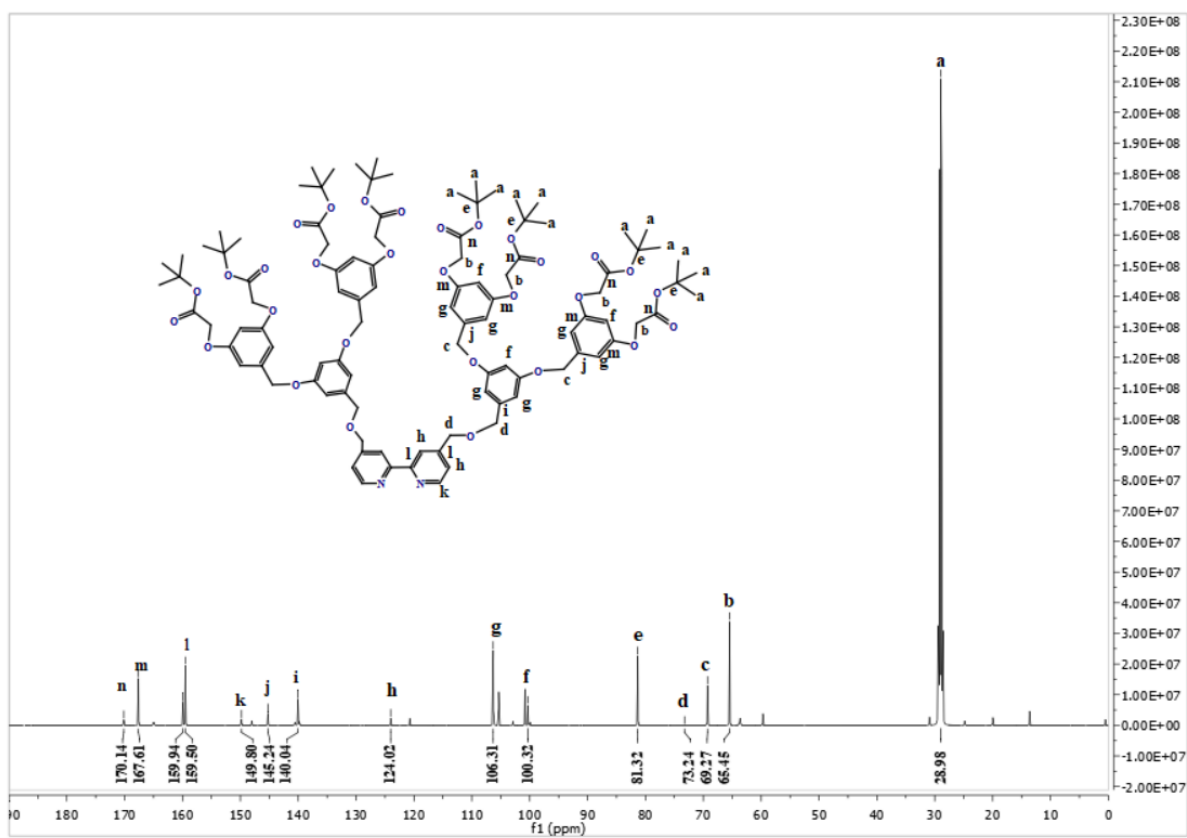

**Figure S19.**  $^{13}\text{C}$ -NMR  $\text{CDCl}_3$  spectra of 4,4'-[3'',5''-bis[3''',5''']-bis(2-(tert-butoxy)-2-oxoethoxy)benzyloxy] benzyloxy] 2,2'-bipyridine **G1-bpy**



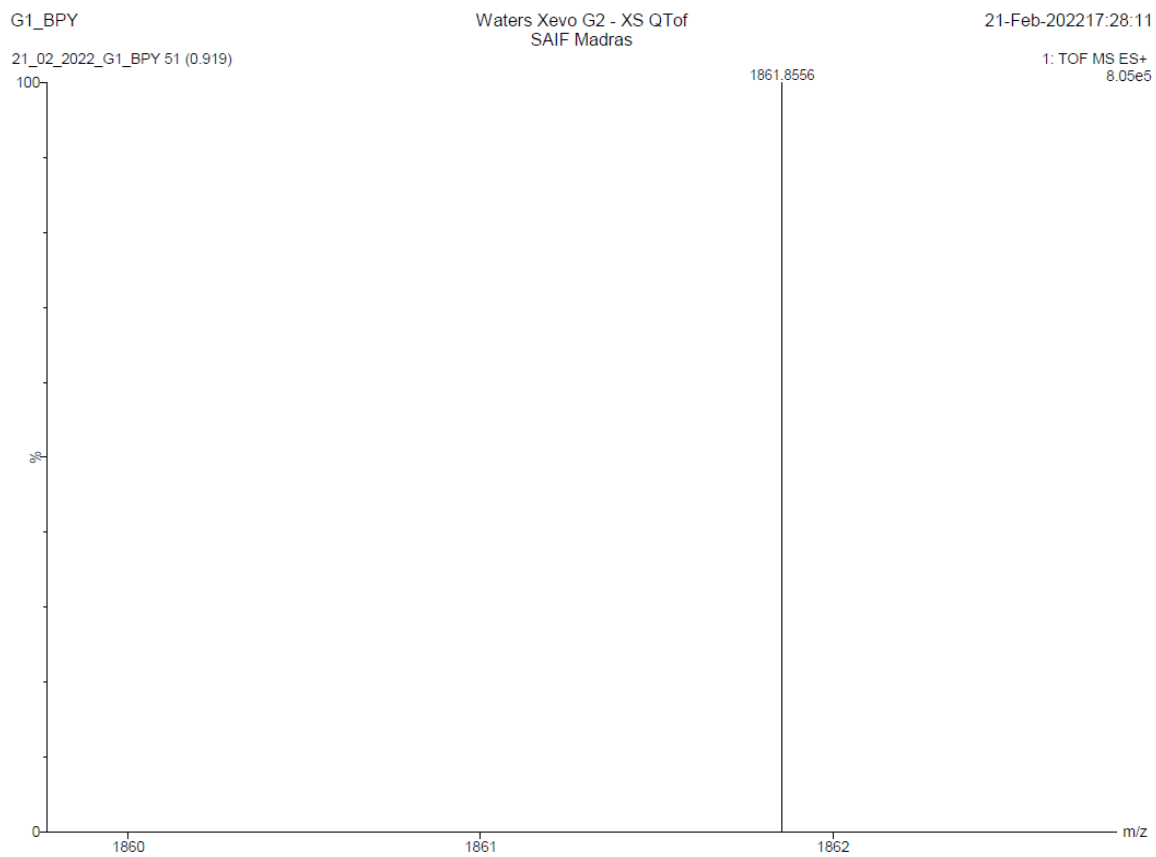

**Figure S20.** HRMS  $\text{CDCl}_3$  spectra of 4,4'-[3'',5''-bis[3''',5'''-bis(2-(tert-butoxy)-2-oxoethoxy)benzyloxy] benzyloxy] 2,2'-bipyridine **G1-bpy**

9. 4,4'-bis [3'',5''-bis [3''',5'''-bis [3''''',5''''-bis (2-(tert-butoxy)-2-oxoethoxy)benzyloxy] benzyloxy] benzyloxy] 2,2'- bipyridine **G2-bpy**

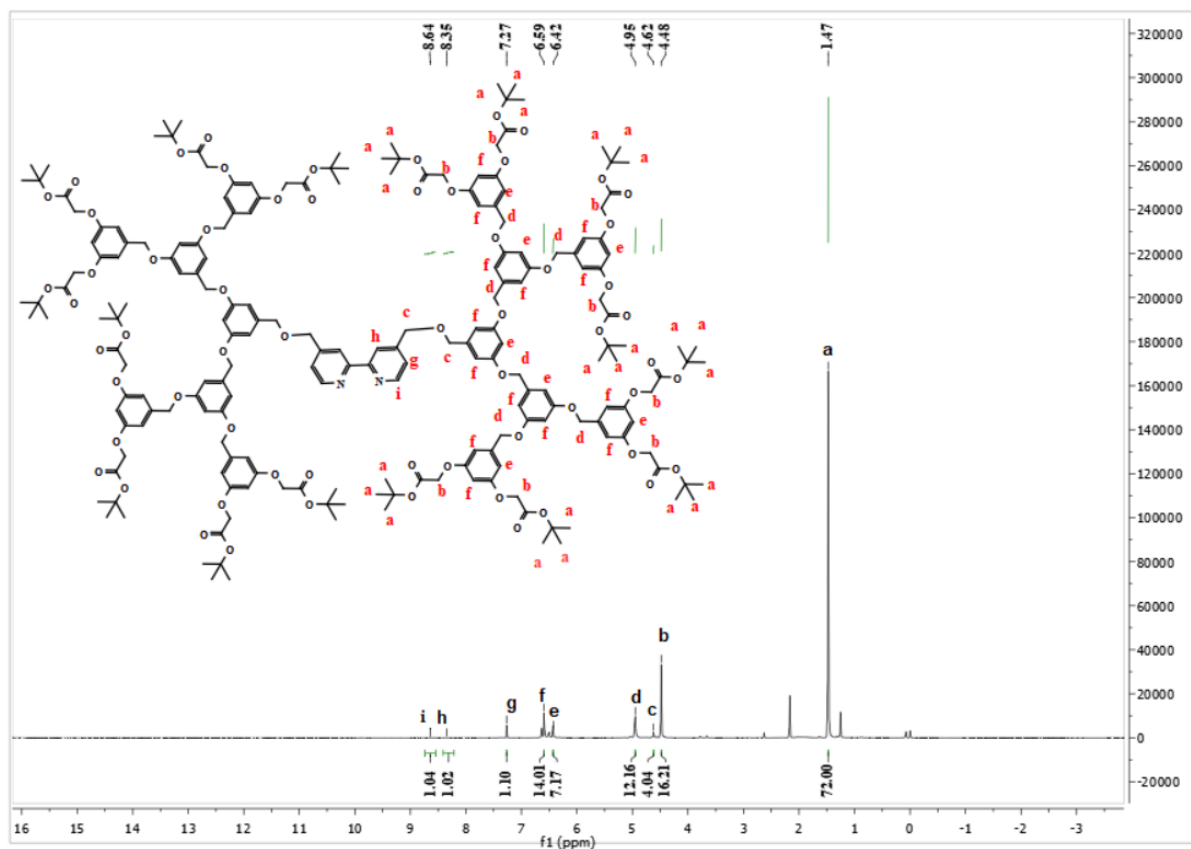

**Figure S21.** <sup>1</sup>H NMR CDCl<sub>3</sub> spectra of 4,4'-bis [3'',5''-bis [3''',5'''-bis [3''''',5''''-bis (2-(tert-butoxy)-2-oxoethoxy)benzyloxy] benzyloxy] benzyloxy] 2,2'- bipyridine **G2-bpy**

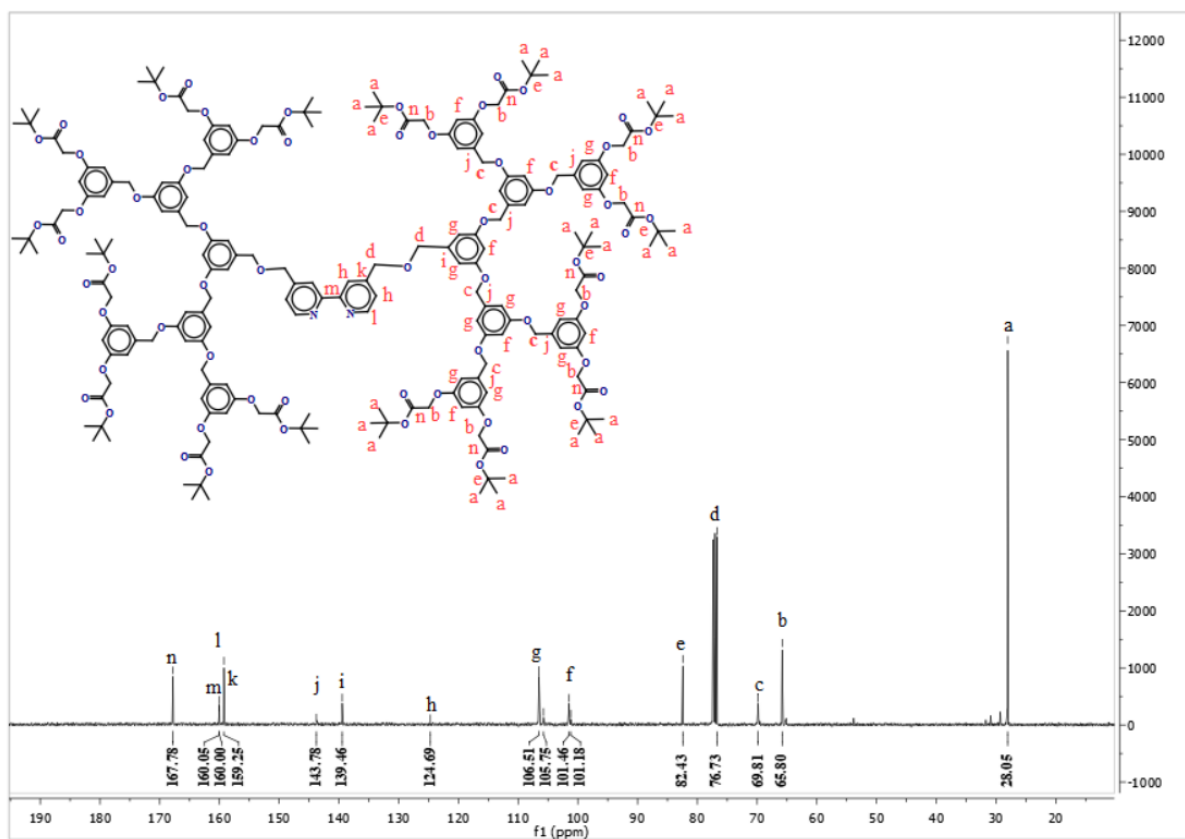

**Figure S22.**  $^{13}\text{C}$ -NMR  $\text{CDCl}_3$  spectra of 4,4'-bis [3'',5''-bis [3''',5'''-bis [3''',5''''-bis (2-(tert-butoxy)-2-oxoethoxy)benzyloxy] benzyloxy] benzyloxy] 2,2'- bipyridine **G2-bpy**

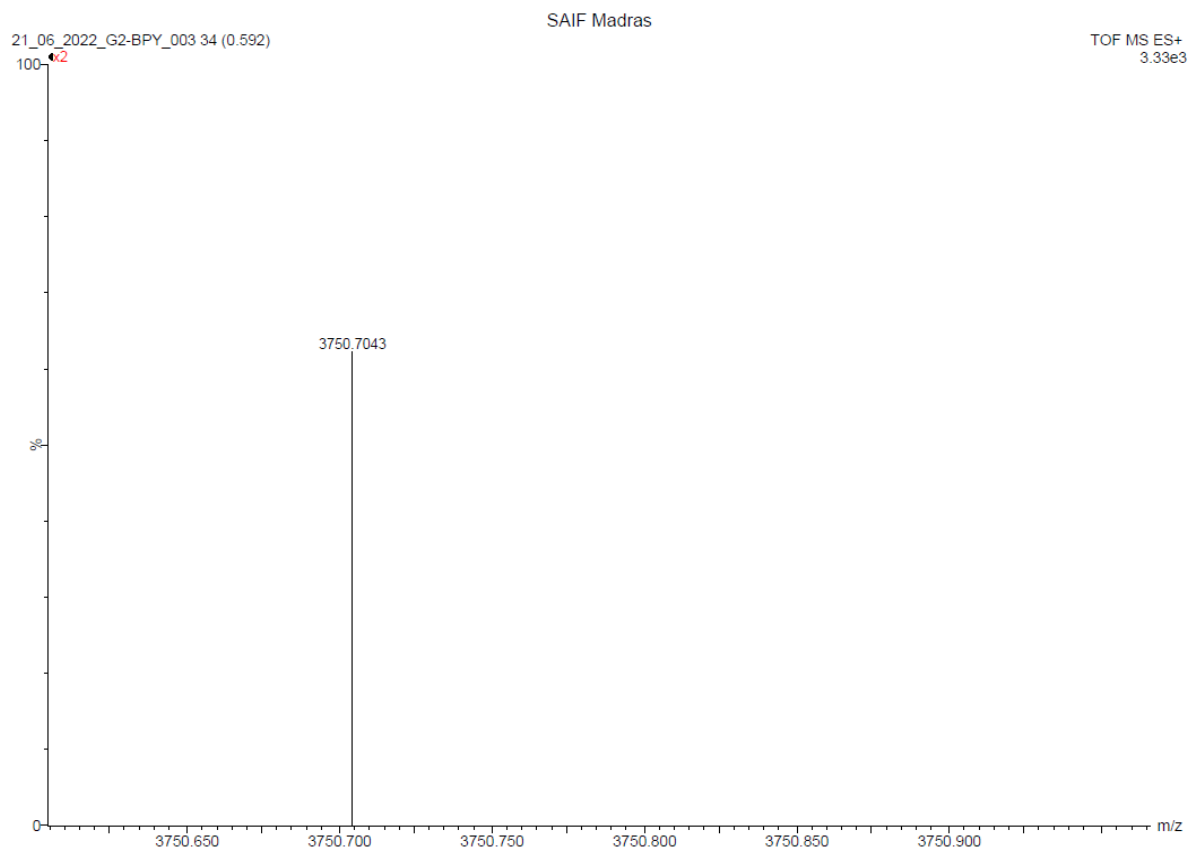

**Figure S23.** HRMS spectra of 4,4'-bis [3'',5''-bis [3''',5'''-bis [3''''',5''''-bis (2-(tert-butoxy)-2-oxoethoxy)benzyloxy] benzyloxy] benzyloxyl] 2,2'- bipyridine **G2-bpy**

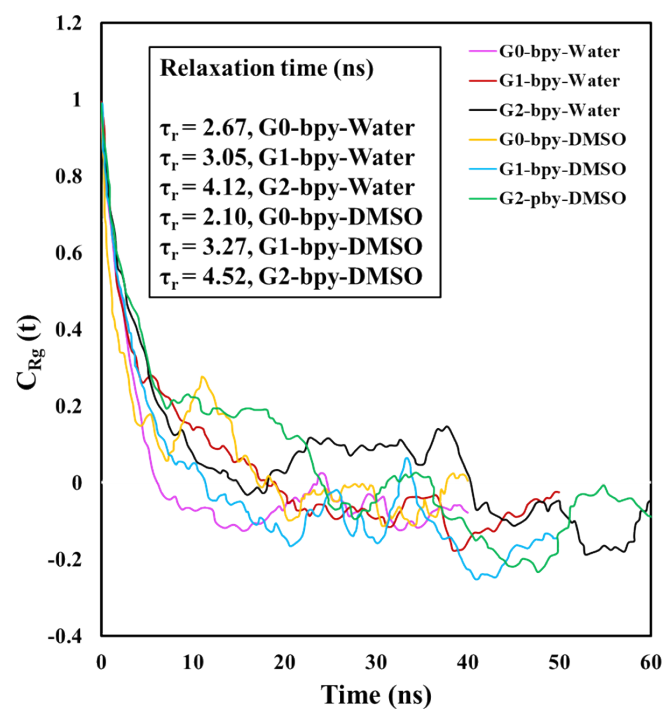

**Figure S24.** Autocorrelation function of the radius of gyration as a function of time  $C_{Rg}(t)$  for G0, G1, and G2 dendrons in water and DMSO. The values in the graph are the calculated relaxation times ( $\tau_r$ ).

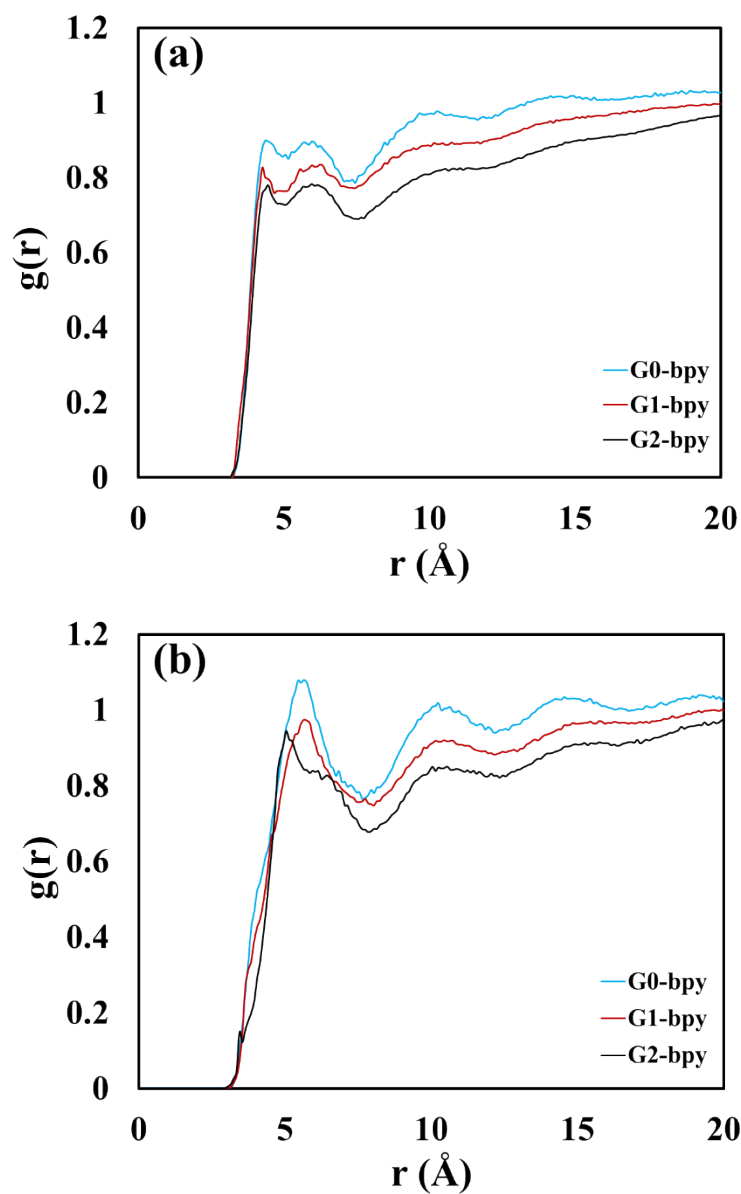

**Figure S25.** Radial distribution function between (a) the carbon atoms from dendron and DMSO, and (b) the oxygen from dendrons and sulphur atoms from DMSO.  $g(r)$  data analysis is based on the last 10 ns of the simulations.

## Reference

- (1) Ciana, L. D.; Dressick, W. J.; Von Zelewsky, A. Synthesis of 4,4'-Divinyl-2,2'-Bipyridine. *Journal of Heterocyclic Chemistry* **1990**, *27* (2), 163–165. <https://doi.org/10.1002/jhet.5570270209>.
